# Supplementary material
Source: PubMed Central journal article supplement (PMC6916292)
Supplement: HEP-70-2171-s001.pdf [file HEP-70-2171-s001.pdf]

**Supplemental figure legends**

**Figure S1.** (A) Plasma bile acid levels in C57BL/6 mice infused with S4048 or vehicle (n = 7). (B) Plasma and (C) Fecal bile acid composition in L-*G6pc*<sup>-/-</sup> and L-*G6pc*<sup>+/+</sup> mice (n = 7-8). (D) Plasma C4 levels in L-*G6pc*<sup>-/-</sup> and L-*G6pc*<sup>+/+</sup> mice in either fed state or after an overnight fast (n = 7-8). (E) mRNA expression in IHH cells after low (1 mM) or high (11 mM) glucose exposure for 24 hours (n = 6).

Data represent Tukey boxplots. \*\*\*p < 0.001, \*\* p < 0.01 indicates significance compared to wildtype littermates or low glucose exposure.

**Figure S2.** (A) Hepatic *Cyp7a1* mRNA levels in L-*FoxO1,3,4*<sup>+/+</sup> and L-*FoxO1,3,4*<sup>-/-</sup> mice treated with S4048 or vehicle (n = 7-9). (B) Hepatic mRNA levels in C57BL/6 mice treated with either shChREBP or scrambled shRNA and infused with S4048 or vehicle (n = 6-7). (C) Hepatic mRNA and (D) Protein levels of bile acid synthesis enzymes in L-*G6pc*<sup>+/+</sup> and L-*G6pc*<sup>-/-</sup> mice treated with either shChREBP or scrambled shRNA (n = 3-6). Hepatic mRNA levels of transcriptional regulators of *Cyp8b1* in (E) S4048 or vehicle-infused C57BL/6 mice or (F) L-*G6pc*<sup>-/-</sup> and L-*G6pc*<sup>+/+</sup> mice treated with either shChREBP or scrambled shRNA (n = 4-7). (G) mRNA expression in IHH cells exposed to low glucose (1 mM) or high glucose (11 mM) or transfected with siChREBP or scramble after high glucose exposure for 24 hours (n = 6). (H) Biliary bile acid composition in mice treated with either shChREBP or scrambled shRNA and infused with S4048 or vehicle (n = 3-7).

Data represent Tukey boxplots. \*\*\*p < 0.001, \*\*p < 0.01, \*p < 0.05 indicates significance compared to scrambled shRNA. ####p < 0.001, ##p < 0.01, #p < 0.05 indicates significance compared to vehicle controls or wildtype littermates.

**Figure S3.** (A) *In vivo* ChIP analysis of the putative HNF4 response elements of the hepatic *Cyp8b1* and *L-pk* gene and (B) acetylated histone H3 at the hepatic *Cyp8b1* gene locus in mice treated with either shChREBP or scrambled shRNA and infused with S4048 or vehicle (n = 4-7).

Data represent means  $\pm$  SEM. \* $p < 0.05$  indicates significance compared to scrambled shRNA. # $p < 0.05$  indicates significance compared to vehicle controls.

**Figure S4.** (A) Correlation between *Cyp8b1* mRNA levels and bile hydrophobicity index and (B) correlation between *Cyp8b1* mRNA levels and fecal neutral sterol excretion in L-*G6pc*<sup>-/-</sup> and L-*G6pc*<sup>+/+</sup> mice (n = 8). (C) Fecal excretion of coprostanol (Copr), cholesterol (Chol) and dihydroxy-cholesterol (DiH-Col) in L-*G6pc*<sup>-/-</sup> and L-*G6pc*<sup>+/+</sup> mice and C57BL/6 mice treated with either shChREBP or scrambled shRNA (n = 7-14). (D) Fecal energy excretion and (E) fecal fatty acid excretion in L-*G6pc*<sup>-/-</sup> and L-*G6pc*<sup>+/+</sup> mice and C57BL/6 mice treated with either shChREBP or scrambled shRNA (n = 7-14).

Data represent Tukey boxplots. \*\*\* $p < 0.001$ , \* $p < 0.05$  indicates significance compared to wildtype littermates or scrambled shRNA.

# Figure S1

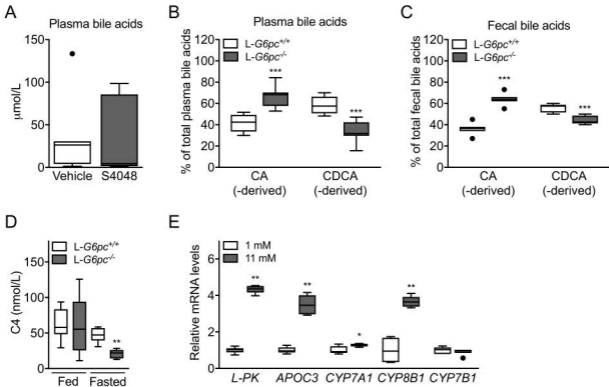

**Figure S2**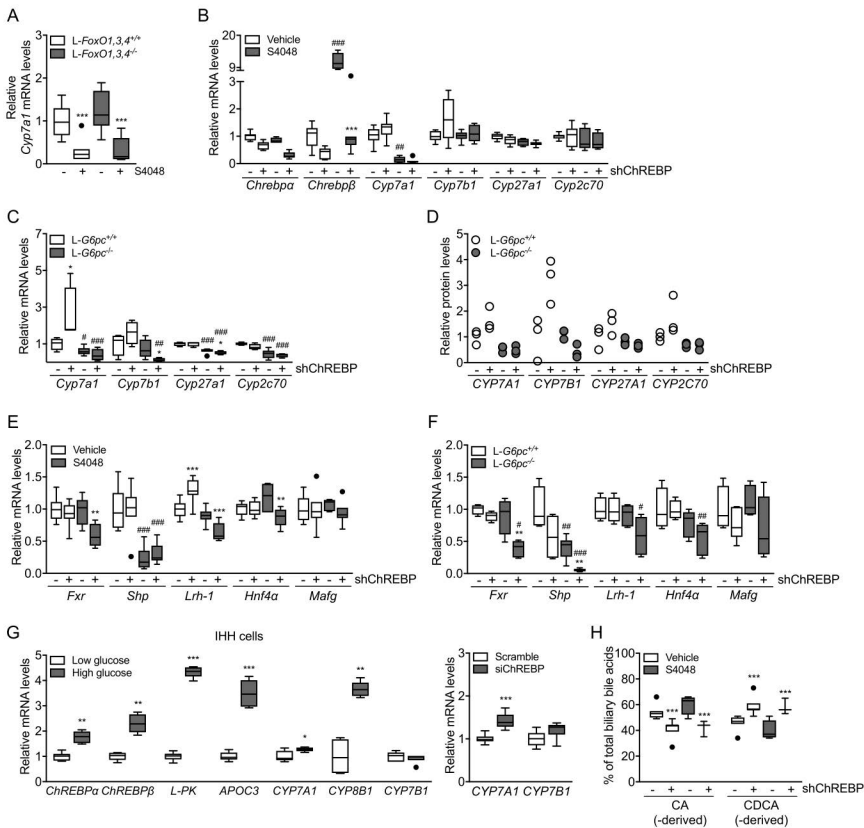

# Figure S3

A

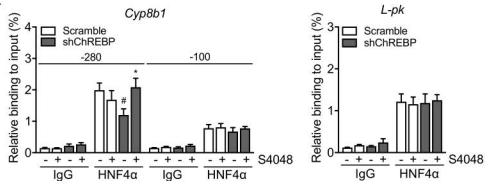

B

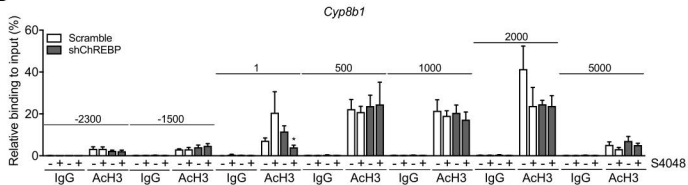

**Figure S4**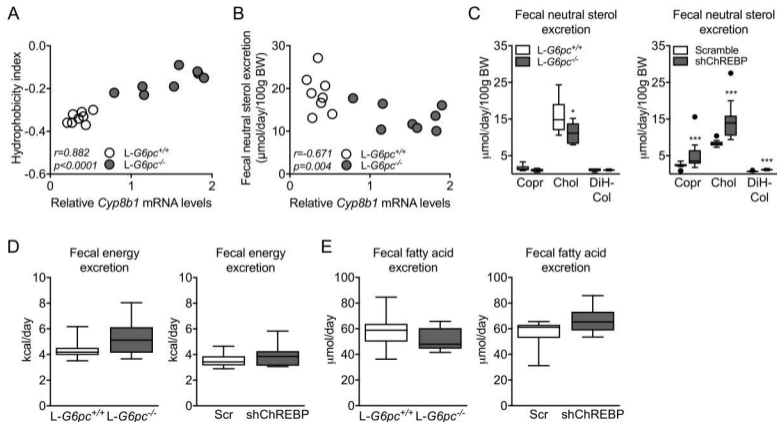

**Table S1.** Metabolic parameters in male C57BL/6 mice treated with S4048 or vehicle and in fasted L-G6pc<sup>-/-</sup> mice and wildtype littermates

|                                | C57BL/6 Vehicle<br>Median (Range) | C57BL/6 S4048<br>Median (Range) | <i>p</i> -value | L-G6pc <sup>+/+</sup><br>Median (Range) | L-G6pc <sup>-/-</sup><br>Median (Range) | <i>p</i> -value  |
|--------------------------------|-----------------------------------|---------------------------------|-----------------|-----------------------------------------|-----------------------------------------|------------------|
| Body weight (g)                | 21.3 (20.1 – 23.4)                | 22.1 (18.7 – 24.9)              | 0.902           | 28.4 (21.5 – 29.9)                      | 27.5 (25.3 – 32.5)                      | 0.645            |
| Liver weight (g)               | 1.0 (0.8 – 1.0)                   | 1.3 (1.0 – 1.4)                 | <b>0.009</b>    | 1.3 (0.8 – 1.5)                         | 1.8 (1.6 – 2.0)                         | <b>&lt;0.001</b> |
| Liver to body weight ratio (%) | 4.3 (3.5 – 5.0)                   | 5.6 (4.8 – 6.2)                 | <b>0.009</b>    | 4.4 (3.5 – 5.1)                         | 6.7 (6.0 – 7.1)                         | <b>&lt;0.001</b> |
| Blood glucose (mmol/L)         | 6.4 (4.1 – 6.9)                   | 2.4 (1.7 – 2.9)                 | <b>0.001</b>    | 5.0 (3.7 – 8.4)                         | 2.1 (1.7 – 2.4)                         | <b>&lt;0.001</b> |
| Hepatic G6P (nmol/g liver)     | 67.1 (59.2 – 83.7)                | 128.9 (60.6 – 241.0)            | 0.051           | 421.7 (264.5 – 483.3)                   | 2585.5 (1980.9 – 3457.3)                | <b>&lt;0.001</b> |
| Hepatic glycogen (mg/g liver)  | 2.2 (1.3 – 2.7)                   | 39.8 (31.3 – 44.4)              | <b>0.004</b>    | 17.7 (12.4 – 29.5)                      | 54.2 (46.4 – 62.1)                      | <b>&lt;0.001</b> |
| Glucagon (pg/mL)               | 138.4 (78.8 – 200.1)              | 225.4 (135.2 – 649.9)           | <b>0.017</b>    | 112.7 (86.2 – 132.3)                    | 235.9 (136.8 – 581.8)                   | <b>&lt;0.001</b> |
| Insulin (ng/mL)                | 0.2 (0.1 – 0.3)                   | 0.2 (0.1 – 0.3)                 | 0.343           | 0.3 (0.1 – 0.6)                         | 0.2 (0.1 – 0.4)                         | 0.130            |

**Table S2.** Plasma and fecal bile acid profiles in L-G6pc<sup>-/-</sup> mice and wildtype littermates

| Bile acid species               | L-G6pc <sup>+/+</sup> | L-G6pc <sup>-/-</sup> | p-value      |
|---------------------------------|-----------------------|-----------------------|--------------|
|                                 | Median (Range)        | Median (Range)        |              |
| <b>Plasma (μmol/L)</b>          |                       |                       |              |
| CA                              | 0.41 (0.14 – 2.39)    | 0.46 (0.08 – 3.19)    | 1.000        |
| TCA                             | 0.26 (0.08 – 0.35)    | 0.65 (0.14 – 1.29)    | 0.281        |
| DCA                             | 0.62 (0.33 – 1.43)    | 0.30 (0.06 – 1.11)    | 0.232        |
| TDCA                            | 0.11 (0.06 – 0.18)    | 0.26 (0.09 – 0.34)    | <b>0.021</b> |
| UDCA                            | 0.14 (0.03 – 0.36)    | 0.09 (0.05 – 0.16)    | 0.497        |
| TUDCA                           | 0.04 (0.03 – 0.05)    | 0.05 (0.04 – 0.05)    | 1.000        |
| CDCA                            | 0.06 (0.02 – 0.14)    | 0.06 (0.02 – 0.10)    | 0.648        |
| HDCA                            | 0.07 (0.03 – 0.17)    | 0.05 (0.03 – 0.14)    | 0.921        |
| THDCA                           | 0.03 (0.03 – 0.03)    | 0.03 (0.03 – 0.03)    | 1.000        |
| α-MCA                           | 0.10 (0.05 – 0.19)    | 0.04 (0.03 – 0.09)    | 0.114        |
| Tα-MCA                          | 0.05 (0.01 – 0.07)    | 0.08 (0.01 – 0.12)    | 0.106        |
| β-MCA                           | 0.56 (0.14 – 2.63)    | 0.16 (0.03 – 0.89)    | 0.093        |
| Tβ-MCA                          | 0.10 (0.04 – 0.26)    | 0.06 (0.01 – 0.33)    | 0.649        |
| ω-MCA                           | 1.00 (0.48 – 4.25)    | 0.43 (0.11 – 1.75)    | <b>0.040</b> |
| Total                           | 3.14 (1.51 – 11.41)   | 2.62 (0.67 – 8.36)    | 0.232        |
| <b>Feces (μmol/day/100g BW)</b> |                       |                       |              |
| CA                              | 0.57 (0.38 – 0.97)    | 1.01 (0.49 – 1.69)    | <b>0.028</b> |
| UDCA                            | 0.31 (0.19 – 0.51)    | 0.29 (0.20 – 0.36)    | 0.645        |
| DCA                             | 2.24 (1.61 – 3.99)    | 3.22 (1.92 – 4.54)    | <b>0.050</b> |
| HDCA                            | 0.23 (0.15 – 0.55)    | 0.20 (0.11 – 0.26)    | 0.161        |
| α-MCA                           | 0.66 (0.41 – 1.05)    | 0.74 (0.44 – 1.16)    | 0.574        |
| β-MCA                           | 0.96 (0.74 – 1.97)    | 0.61 (0.43 – 1.05)    | <b>0.005</b> |
| ω-MCA                           | 2.61 (1.84 – 4.03)    | 1.64 (0.78 – 2.00)    | <b>0.001</b> |
| Total                           | 7.71 (6.44 – 11.88)   | 8.14 (4.81 – 9.45)    | 0.878        |



**Table S3.** Biliary and plasma bile acid profiles in male C57BL/6 mice injected with either shChREBP or scramble AAV2/8 and treated with S4048 or vehicle

| Bile acid species | Scramble vehicle<br>Median (Range) | Scramble S4048<br>Median (Range) | <i>p</i> -value | ShChREBP vehicle<br>Median (Range) | ShChREBP S4048<br>Median (Range) | <i>p</i> -value |
|-------------------|------------------------------------|----------------------------------|-----------------|------------------------------------|----------------------------------|-----------------|
| Bile (% of total) |                                    |                                  |                 |                                    |                                  |                 |
| CA                | 0.56 (0.22 – 3.16)                 | 2.95 (2.35 – 3.10)               | 0.073           | 0.75 (0.09 – 3.78)                 | 1.38 (0.18 – 3.03)               | 0.833           |
| GCA               | 0.13 (0.11 – 0.18)                 | 0.18 (0.16 – 0.26)               | 0.109           | 0.08 (0.05 – 0.180)                | 0.11 (0.09 – 0.12)               | 0.833           |
| TCA               | 48.65 (46.70 – 62.57)              | 53.93 (43.28 – 56.99)            | 0.527           | 38.15 (24.71 – 47.28)              | 38.37 (32.47 – 45.77)            | 1.000           |
| TDCA              | 2.17 (1.35 – 3.66)                 | 3.80 (2.60 – 4.99)               | <b>0.024</b>    | 0.58 (0.49 – 0.74)                 | 0.83 (0.68 – 1.23)               | 0.067           |
| TUDCA             | 1.00 (0.87 – 1.14)                 | 1.00 (0.96 – 1.41)               | 0.648           | 1.09 (0.68 – 1.30)                 | 1.09 (0.59 – 1.20)               | 0.833           |
| TCDC              | 0.98 (0.68 – 1.27)                 | 1.10 (1.02 – 1.76)               | 0.315           | 1.57 (1.18 – 1.94)                 | 1.79 (0.63 – 2.23)               | 0.833           |
| THDCA             | 0.71 (0.28 – 1.58)                 | 2.65 (0.77 – 3.25)               | <b>0.024</b>    | 0.79 (0.16 – 1.69)                 | 0.91 (0.19 – 1.15)               | 0.833           |
| α-MCA             | 0.03 (0.00 – 0.38)                 | 0.37 (0.21 – 0.38)               | <b>0.024</b>    | 0.05 (0.00 – 0.39)                 | 0.20 (0.00 – 0.64)               | 0.833           |
| Tα-MCA            | 6.80 (5.32 – 8.16)                 | 7.82 (6.96 – 8.55)               | 0.164           | 7.26 (5.65 – 9.15)                 | 10.14 (4.61 – 10.88)             | 0.517           |
| β-MCA             | 0.30 (0.08 – 0.85)                 | 0.43 (0.25 – 0.75)               | 0.648           | 0.41 (0.14 – 1.58)                 | 0.65 (0.18 – 0.99)               | 0.833           |
| Tβ-MCA            | 35.84 (26.48 – 42.43)              | 23.65 (20.66 – 39.14)            | 0.073           | 45.12 (43.05 – 56.81)              | 46.89 (37.42 – 49.76)            | 1.000           |
| ω-MCA             | 0.34 (0.23 – 1.09)                 | 1.06 (0.59 – 1.72)               | <b>0.042</b>    | 0.47 (0.22 – 1.81)                 | 0.64 (0.18 – 2.75)               | 1.000           |
| Plasma (μmol/L)   |                                    |                                  |                 |                                    |                                  |                 |
| CA                | 0.24 (0.14 – 0.71)                 | 0.35 (0.11 – 10.10)              | 0.710           | 2.37 (0.21 – 44.60)                | 0.68 (0.25 – 4.65)               | 0.445           |
| GCA               | 0.04 (0.04 – 0.16)                 | 0.05 (0.03 – 0.09)               | 0.686           | 0.05 (0.03 – 0.24)                 | 0.04 (0.04 – 0.05)               | 0.857           |
| TCA               | 13.30 (0.17 – 65.20)               | 1.80 (0.14 – 37.00)              | 0.620           | 3.94 (0.94 – 31.70)                | 1.95 (0.47 – 17.30)              | 0.165           |
| DCA               | 0.11 (0.07 – 0.57)                 | 0.21 (0.10 – 3.08)               | 0.128           | 0.26 (0.06 – 0.99)                 | 0.12 (0.05 – 0.46)               | 0.534           |
| TDCA              | 0.24 (0.05 – 2.86)                 | 0.14 (0.05 – 2.16)               | 0.805           | 0.14 (0.03 – 0.52)                 | 0.12 (0.05 – 0.64)               | 1.000           |
| UDCA              | 0.03 (0.03 – 0.05)                 | 0.04 (0.03 – 0.26)               | 0.250           | 0.10 (0.05 – 0.52)                 | 0.04 (0.03 – 0.07)               | 0.015           |
| TUDCA             | 0.23 (0.03 – 0.87)                 | 0.09 (0.03 – 0.48)               | 0.662           | 0.10 (0.04 – 0.63)                 | 0.07 (0.04 – 0.33)               | 0.318           |
| CDCA              | 0.05 (0.03 – 0.06)                 | 0.09 (0.04 – 0.29)               | 0.400           | 0.12 (0.03 – 1.44)                 | 0.06 (0.03 – 0.14)               | 0.394           |
| TCDC              | 0.20 (0.05 – 0.79)                 | 0.17 (0.03 – 0.36)               | 0.730           | 0.08 (0.03 – 1.35)                 | 0.05 (0.03 – 0.33)               | 0.383           |
| HDCA              | 0.04 (0.03 – 0.06)                 | 0.04 (0.04 – 0.16)               | 0.267           | 0.07 (0.03 – 0.32)                 | 0.06 (0.03 – 0.16)               | 0.589           |
| THDCA             | 0.07 (0.03 – 0.41)                 | 0.10 (0.04 – 0.51)               | 0.445           | 0.14 (0.05 – 0.45)                 | 0.06 (0.03 – 0.15)               | 0.101           |
| α-MCA             | 0.04 (0.04 – 0.13)                 | 0.14 (0.04 – 0.43)               | 0.229           | 0.22 (0.04 – 3.83)                 | 0.05 (0.03 – 0.39)               | 0.836           |
| Tα-MCA            | 1.36 (0.25 – 5.62)                 | 0.28 (0.03 – 3.56)               | 0.295           | 0.83 (0.21 – 7.40)                 | 0.17 (0.07 – 1.68)               | 0.073           |
| β-MCA             | 0.22 (0.12 – 1.01)                 | 0.26 (0.06 – 6.88)               | 0.805           | 1.53 (0.03 – 18.50)                | 0.69 (0.35 – 5.28)               | 0.165           |
| Tβ-MCA            | 9.66 (0.07 – 52.60)                | 0.64 (0.11 – 39.80)              | 0.535           | 4.52 (1.56 – 59.00)                | 1.37 (0.31 – 26.50)              | 0.097           |
| ω-MCA             | 0.51 (0.25 – 2.46)                 | 0.89 (0.42 – 6.88)               | 0.318           | 1.42 (0.10 – 5.97)                 | 1.03 (0.39 – 4.15)               | 0.535           |
| Total             | 26.32 (1.27 – 133.43)              | 4.46 (1.30 – 98.50)              | 0.620           | 13.67 (3.80 – 166.63)              | 6.69 (3.18 – 51.00)              | 0.383           |

**Table S4.** Fecal bile acid profile in chow-fed C57BL/6 mice injected with either shChREBP or scramble AAV2/8

| Bile acid species                     | Scramble           | shChREBP           | <i>p</i> -value  |
|---------------------------------------|--------------------|--------------------|------------------|
|                                       | Median (Range)     | Median (Range)     |                  |
| Feces ( $\mu\text{mol/day/100g BW}$ ) |                    |                    |                  |
| CA                                    | 1.48 (0.36 – 2.54) | 1.03 (0.22 – 2.02) | 0.210            |
| DCA                                   | 1.55 (0.81 – 2.04) | 0.92 (0.49 – 1.27) | <b>&lt;0.001</b> |
| CDCA                                  | 0.07 (0.00 – 0.15) | 0.00 (0.00 – 0.13) | 0.743            |
| $\alpha$ -MCA                         | 0.40 (0.29 – 0.53) | 0.31 (0.21 – 0.41) | <b>0.002</b>     |
| $\beta$ -MCA                          | 0.83 (0.47 – 1.40) | 0.93 (0.35 – 1.67) | 0.210            |
| $\omega$ -MCA                         | 1.15 (0.66 – 1.58) | 1.11 (0.52 – 1.78) | 0.946            |
| Total                                 | 5.31 (3.61 – 7.01) | 4.61 (2.54 – 5.57) | 0.085            |

**Table S5.** Biliary and plasma bile acid profiles in chow-fed L-G6pc<sup>-/-</sup> mice and wildtype littermates, injected with either shChREBP or scramble AAV2/8

|                          | L-G6pc <sup>+/+</sup> Scramble | L-G6pc <sup>+/+</sup> shChREBP | p-value      | L-G6pc <sup>-/-</sup> Scramble | L-G6pc <sup>-/-</sup> shChREBP | p-value      |
|--------------------------|--------------------------------|--------------------------------|--------------|--------------------------------|--------------------------------|--------------|
|                          | Median (Range)                 | Median (Range)                 |              | Median (Range)                 | Median (Range)                 |              |
| <b>Bile (% of total)</b> |                                |                                |              |                                |                                |              |
| CA                       | 5.69 (1.97 – 7.32)             | 0.53 (0.00 – 3.46)             | 0.057        | 4.47 (3.64 – 7.80)             | 0.04 (0.00 – 0.22)             | <b>0.016</b> |
| GCA                      | 0.27 (0.11 – 0.30)             | 0.00 (0.00 – 0.11)             | <b>0.029</b> | 0.23 (0.21 – 0.39)             | 0.01 (0.00 – 0.09)             | <b>0.016</b> |
| TCA                      | 52.81 (46.69 – 59.94)          | 16.57 (10.70 – 29.58)          | <b>0.029</b> | 64.54 (50.90 – 68.52)          | 30.42 (25.20 – 41.08)          | <b>0.016</b> |
| TUDCA                    | 1.77 (1.01 – 2.35)             | 0.61 (0.21 – 1.19)             | 0.057        | 1.71 (0.46 – 2.10)             | 0.10 (0.00 – 0.22)             | <b>0.016</b> |
| TCDCa                    | 1.20 (0.48 – 1.79)             | 0.83 (0.45 – 1.11)             | 0.686        | 1.70 (0.38 – 1.94)             | 0.06 (0.00 – 0.13)             | <b>0.016</b> |
| TDCA                     | 1.83 (0.92 – 2.79)             | 0.06 (0.00 – 0.60)             | <b>0.029</b> | 1.22 (0.62 – 2.19)             | 0.01 (0.00 – 0.04)             | <b>0.016</b> |
| THDCA                    | 0.67 (0.45 – 1.16)             | 0.14 (0.00 – 0.39)             | <b>0.029</b> | 0.43 (0.24 – 0.68)             | 0.03 (0.00 – 0.07)             | <b>0.016</b> |
| α-MCA                    | 0.22 (0.06 – 0.53)             | 0.14 (0.00 – 0.34)             | 0.486        | 0.33 (0.14 – 0.72)             | 0.00 (0.00 – 0.01)             | <b>0.016</b> |
| Tα-MCA                   | 5.34 (3.30 – 8.70)             | 2.54 (0.76 – 4.80)             | 0.114        | 7.26 (2.71 – 7.98)             | 0.50 (0.42 – 0.68)             | <b>0.016</b> |
| β-MCA                    | 1.08 (0.31 – 1.74)             | 2.22 (0.00 – 4.40)             | 0.686        | 0.41 (0.32 – 1.07)             | 0.05 (0.00 – 0.49)             | 0.111        |
| Tβ-MCA                   | 26.41 (24.28 – 36.30)          | 75.66 (53.19 – 86.35)          | <b>0.029</b> | 19.37 (13.24 – 24.00)          | 68.67 (58.49 – 72.89)          | <b>0.016</b> |
| ω-MCA                    | 0.73 (0.25 – 2.19)             | 0.91 (0.00 – 1.93)             | 0.886        | 0.35 (0.23 – 0.77)             | 0.01 (0.00 – 0.13)             | <b>0.016</b> |
| <b>Plasma (μmol/L)</b>   |                                |                                |              |                                |                                |              |
| CA                       | 2.48 (1.51 – 3.44)             | 0.19 (0.19 – 0.19)             | 0.221        | 2.78 (2.03 – 3.28)             | 0.84 (0.82 – 24.00)            | 0.513        |
| TCA                      | 2.63 (0.73 – 4.54)             | 6.75 (6.74 – 6.76)             | 0.121        | 4.19 (1.63 – 5.14)             | 159.00 (39.20 – 250.00)        | <b>0.050</b> |
| GCA                      | 0.03 (0.02 – 0.03)             | 0.03 (0.02 – 0.04)             | 0.683        | 0.03 (0.02 – 0.04)             | 0.69 (0.27 – 1.42)             | 0.083        |
| DCA                      | 0.71 (0.42 – 1.00)             | 0.02 (0.01 – 0.03)             | 0.121        | 0.33 (0.29 – 0.52)             | 0.03 (0.02 – 0.03)             | <b>0.050</b> |
| TDCA                     | 0.14 (0.07 – 0.21)             | 0.03 (0.03 – 0.03)             | 0.121        | 0.11 (0.09 – 0.14)             | 0.11 (0.08 – 0.29)             | 1.000        |
| UDCA                     | 0.35 (0.27 – 0.43)             | 0.03 (0.03 – 0.03)             | 0.221        | 0.24 (0.17 – 0.33)             | 0.03 (0.03 – 0.03)             | 0.180        |
| TUDCA                    | 0.09 (0.05 – 0.14)             | 0.12 (0.11 – 0.14)             | 0.439        | 0.08 (0.06 – 0.10)             | 0.58 (0.35 – 0.82)             | <b>0.050</b> |
| CDCA                     | 0.13 (0.09 – 0.17)             | 0.04 (0.04 – 0.04)             | 0.221        | 0.13 (0.10 – 0.15)             | 0.01 (0.01 – 0.01)             | <b>0.037</b> |
| TCDCa                    | 0.05 (0.01 – 0.08)             | 0.21 (0.21 – 0.22)             | 0.121        | 0.07 (0.05 – 0.11)             | 0.53 (0.32 – 0.84)             | <b>0.050</b> |
| GCDCa                    | 0.01 (0.01 – 0.01)             | 0.01 (0.01 – 0.01)             | 0.121        | 0.01 (0.01 – 0.01)             | 0.02 (0.01 – 0.04)             | <b>0.050</b> |
| HDCA                     | 0.14 (0.10 – 0.17)             | 0.01 (0.01 – 0.01)             | 0.221        | 0.10 (0.08 – 0.11)             | 0.01 (0.01 – 0.03)             | <b>0.046</b> |
| GHDCa                    | 0.00 (0.00 – 0.00)             | 0.01 (0.01 – 0.010)            | 0.121        | 0.00 (0.00 – 0.00)             | 0.10 (0.07 – 0.21)             | <b>0.050</b> |
| THDCA                    | 0.05 (0.03 – 0.06)             | 0.04 (0.04 – 0.04)             | 1.000        | 0.03 (0.02 – 0.07)             | 0.26 (0.17 – 0.35)             | 0.083        |
| α-MCA                    | 0.20 (0.07 – 0.32)             | 0.02 (0.02 – 0.02)             | 0.221        | 0.20 (0.17 – 0.21)             | 0.05 (0.02 – 0.08)             | 0.083        |
| Tα-MCA                   | 0.41 (0.14 – 0.68)             | 0.45 (0.35 – 0.55)             | 1.000        | 0.41 (0.14 – 0.42)             | 2.06 (1.41 – 4.28)             | <b>0.050</b> |
| β-MCA                    | 1.81 (1.27 – 2.35)             | 0.87 (0.15 – 1.60)             | 0.439        | 0.93 (0.93 – 1.62)             | 4.46 (1.43 – 18.70)            | 0.121        |
| Tβ-MCA                   | 1.24 (0.23 – 2.24)             | 36.80 (21.30 – 52.30)          | 0.121        | 0.93 (0.23 – 1.02)             | 322.00 (130.00 – 353.00)       | <b>0.050</b> |
| ω-MCA                    | 2.15 (1.46 – 2.84)             | 0.56 (0.09 – 1.04)             | 0.121        | 1.04 (0.87 – 1.16)             | 1.24 (0.38 – 8.58)             | 0.513        |
| Tω-MCA                   | 10.09 (3.78 – 16.40)           | 97.25 (70.50 – 124.00)         | 0.121        | 4.73 (2.48 – 5.77)             | 524.00 (168.00 – 1110.00)      | <b>0.050</b> |
| Total                    | 22.68 (10.26 – 35.09)          | 143.28 (102.51 – 187.05)       | 0.121        | 17.55 (10.11 – 18.20)          | 1012.28 (346.47 – 1772.22)     | <b>0.050</b> |

**Table S6.** Taqman and SYBR Green qPCR primer and probe sequences

| Gene                             | Species | Forward primer 5'-3'                             | Reverse primer 5'-3'                               | TaqMan probe 5'-3'                           |
|----------------------------------|---------|--------------------------------------------------|----------------------------------------------------|----------------------------------------------|
| <b>Primers for qPCR</b>          |         |                                                  |                                                    |                                              |
| <i>36b4</i>                      | Mouse   | GCT TCA TTG TGG GAG CAG ACA                      | CAT GGT GTT CTT GCC CAT CAG                        | TCC AAG CAG ATG CAG CAG ATC CGC              |
| <i>18S</i>                       | Human   | CGG CTA CCA CAT CCA AGG A                        | CCA ATT ACA GGG CCT CGA AA                         | CGC GCA AAT TAC CCA CTC CCG A                |
| <i>Cyp8b1</i>                    | Mouse   | AAG GCT GGC TTC CTG AGC TT                       | AAC AGC TCA TCG GCC TCA TC                         | CGG CTA CAC CAA GGA CAA GCA GCA AG           |
| <i>CYP8B1</i>                    | Human   | CCT GAG CTT GTT CGG CTA CAC                      | TGC GGA ACT CCA TGA ATA ACT CTC                    | CCT GTA GCA GGT CCT GCT CCT TGT CCT T        |
| <i>Cyp7a1</i>                    | Mouse   | CAG GGA GAT GCT CTG TGT TCA                      | AGG CAT ACA TCC CTT CCG TGA                        | TGC AAA ACC TCC AAT CTG TCA TGA GAC<br>CTC C |
| <i>CYP7A1</i>                    | Human   | TCA GCT TGG AAG GCA ATC CTA T                    | AGC CTC AGC GAT TCC TTG ATT A                      | CTG GCA GGT CAT TCA GTT CTG CTT GAC TC       |
| <i>Cyp7b1</i>                    | Mouse   | TGA AAT AGG AGC ACA TCA TCT TGG                  | AAT ACA TTG CCC AGA ACA TAG CTG                    | CTC TGG GCC TCT CTA GCA AAC ACC ATT C        |
| <i>CYP7B1</i>                    | Human   | CTT GAA ATA GGA GCA CAT CAT TTA GG               | GAT AAT ACA TTG CCC AGA ACA TAG TTG                | CTC TGG GCC TCT GTG GCA AAC ACT ATT C        |
| <i>Cyp27a1</i>                   | Mouse   | GCC TTG CAC AAG GAA GTG ACT                      | CGC AGG GTC TCC TTA ATC ACA                        | CCC TTC GGG AAG GTG CCC CAG                  |
| <i>Cyp2c70<sup>a</sup></i>       | Mouse   | CCA CAG TGA AAT ATG GGC TTT T                    | AAT TTA GCT GTG ACT TCT GG                         |                                              |
| <i>ChREBP<math>\alpha</math></i> | Mouse   | CGA CAC TCA CCC ACC TCT TC                       | TTG TTC AGC CGG ATC TTG TC                         | CCT GGC TTA CAG TGG CAA GCT GGT CTC T        |
| <i>ChREBP<math>\alpha</math></i> | Human   | AGT GCT TGA GCC TGG CCT AC                       | TTG TTC AGG CGG ATC TTG TC                         |                                              |
| <i>ChREBP<math>\beta</math></i>  | Mouse   | TCT GCA GAT CGC GTG GAG                          | CTT GTC CCG GCA TAG CAA C                          | CTC AGT GGC AAG CTG GTC TCT CCC A            |
| <i>ChREBP<math>\beta</math></i>  | Human   | AGC GGA TTC CAG GTG AGG                          | TTG TTC AGG CGG ATC TTG TC                         |                                              |
| <i>Fxr</i>                       | Mouse   | CGC TGA GAT GCT GAT GTC TTG                      | CCA TCA CTG CAC ATC CCA GAT                        | ATG ATC ACA AGT TCA CCC CGC TCC TCT          |
| <i>Shp</i>                       | Mouse   | AAG GGC ACG ATC CTC TTC AA                       | CTG TTG CAG GTG TGC GAT GT                         | ATG TGC CAG GCC TCC GTG CC                   |
| <i>Lrh-1</i>                     | Mouse   | TGC TGG AGT GAG CTC TTG ATT C                    | GAT GGT GGA GTA GTC CAC GTG T                      | CCT TCC TTC CCA TGC GCC ACT TG               |
| <i>Hnf4<math>\alpha</math></i>   | Mouse   | ATG CCA AGG GGC TGA GTG AC                       | GCC GGT CGT TGA TGT AAT CCT                        | CAC CTG TGA CCG CAG CCG CTT G                |
| <i>L-PK</i>                      | Human   | TGT CTG TGC CAC ACA GAT GCT                      | CAT TGG CGA CAT CGC TTG TCT                        | CAT GAT TAC CAA GCC CCG GCC AAC              |
| <i>APOC3</i>                     | Human   | ATG AAG CAC GCC ACC AAG AC                       | TTG TCC TTA ACG GTG CTC CAG TA                     | CAC CCA GCC CCT GGC CTG CT                   |
| <i>Mafg<sup>a</sup></i>          | Mouse   | CAA GGC CTT AAA GGT GAA GCG                      | TTC AAC TCT CGC ACC GAC AT                         |                                              |
| <i>Acly</i>                      | Mouse   | GGA GAA GTT GGG AAG ACC ACT G                    | CAA TGG CCG TCA TGT GAG TT                         | ATC CCC ATC CAT GTC TTT GGC ACA GA           |
| <b>Primers for subcloning</b>    |         |                                                  |                                                    |                                              |
| <i>ChREBP<math>\alpha</math></i> |         | GCG AAA CTT AAG AGA TCT ATG GCG<br>CGC GCG CT    | GCG AAA GCG GCC GCG CTT GGA AAC<br>TTT CAC CAG G   |                                              |
| <i>ChREBP<math>\beta</math></i>  |         | GCG AAA CTT AAG ATG CGC GAA TAC<br>CAC AAG TGG A | GCG AAA GCG GCC GCG CTT GGA AAC<br>TTT CAC CAG G   |                                              |
| <i>Mlx</i>                       |         | GCG AAA AAG CTT ATG GCC TAC CCA<br>TAC GAC GT    | GCG AAA CTC GAG TCA GTA GAG TTG<br>GTT TTT CAA CTG |                                              |

<sup>a</sup>Sybr Green method used

**Table S7.** SYBR Green primers used for ChIP-qPCR

| Region                              | Forward primer 5'-3'          | Reverse primer 5'-3'           |
|-------------------------------------|-------------------------------|--------------------------------|
| <i>L-pk</i>                         | GCT CTG CAG ACA GGC CAA AG    | TCT TGC CAA TGG AAG CCT TG     |
| <i>Cyp8b1</i> region a <sup>a</sup> | GAG ACG AGG AAA GAG ATG TG    | CAC CGA CTG CTC ACA TTC C      |
| <i>Cyp8b1</i> region b <sup>a</sup> | GAG CTG AAC CTG AAC AGT AG    | CAG AGG CTC GGA CGT G          |
| <i>Cyp8b1</i> region c <sup>a</sup> | ACC ACG TCC GAG CCT CTG       | GGA ATT GCT TTA TGT GGC        |
| <i>Cyp8b1</i> region d <sup>a</sup> | GGT GGG CTC AAG GCA G         | GCT GAC TAG AGA GAC GAT G      |
| <i>Cyp8b1</i> region -2300          | CTG CAG GAC AGA TTT CAT CTT G | TCA ACT GCA GAA TGT GTT AGG AC |
| <i>Cyp8b1</i> region -1500          | AGG CCC CAC AGA TAG ATT CA    | CTG AGC ATC TGT CAG GGT GA     |
| <i>Cyp8b1</i> region -280           | TAA GGA GAC ACC GTC TCT AC    | GAG ACC TGA CAT CCC TCT AC     |
| <i>Cyp8b1</i> region -100           | TTG CAG AGG ACG ATA CC        | AAA GTG CGT GTC TGT G          |
| <i>Cyp8b1</i> region 1              | CAG CGC TGT AGA GCT GAC AA    | CAC TGT ACA CCA CAG CGT CA     |
| <i>Cyp8b1</i> region 500            | TCC TGA GCT TAT TCG GCT ACA   | CGG AAC TTC CTG AAC AGC TC     |
| <i>Cyp8b1</i> region 1000           | CAG CGG ACA AGA GTA CCA GA    | GGG GTC CAT GTG TAC TGA GAG    |
| <i>Cyp8b1</i> region 2000           | CGA TGC CCT TAC TCC AAA TC    | CTC GAT TCC ATT GAG CAA CA     |
| <i>Cyp8b1</i> region 5000           | TGG AAG CTG CTG AGA AAG TG    | CTC AGG TCC TGG CTT TTG TC     |

<sup>a</sup>Regions are explained in the manuscript
